# Supplementary material
Source: PubMed Central journal article supplement (PMC6872451)
Supplement: EMS84961-supplement-Supplementary_Material.pdf [file EMS84961-supplement-Supplementary_Material.pdf]

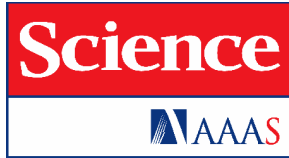

## Supplementary Materials for Cellular survival over genomic perfection

**Serena Nik-Zainal\* and Benjamin A. Hall**

\*Email: [snz@mrc-cu.cam.ac.uk](mailto:snz@mrc-cu.cam.ac.uk)

Published 15 November 2019, *Science* **366**, 802 (2019)  
DOI: [10.1126/science.aax8046](https://doi.org/10.1126/science.aax8046)

**This PDF file includes:**

Captions for Movies S1 and S2

**Other Supplementary Materials for this manuscript include the following:**  
(available at [science.sciencemag.org/content/366/6467/802/suppl/DC1](https://science.sciencemag.org/content/366/6467/802/suppl/DC1))

Movies S1 and S2

## **Movie Captions**

### **Movie S1. Modeling the costs of DNA repair.**

S1 shows a mathematical model [derived and reinterpreted from Breivik and Gaudernack (13)] that explores relationships between DNA damage and the costs associated with limited or unlimited DNA repair. In this model, most DNA damage is not associated with a deleterious effect. DNA-repair-limited cells (cyan) are more likely to survive, whereas the costs of unlimited DNA repair (blue) result in potential apoptosis (black dots). DDR, DNA repair. Model parameters (top left corner): pdeath, probability of apoptosis; DamageRate, rate of DNA damage; repairtime, time spent in repair.

### **Movie S2. The costs of DNA repair when DNA damage is highly deleterious.**

S2 shows an alternative (even if unlikely) model that if DNA damaging events are highly deleterious (for example, if most mutations affected protein function), DNA-repair-limited cells are unlikely to survive. DNA-repair-unlimited cells may avoid apoptosis, although cell division rate would be reduced, owing to repair and checkpoint activation, potentially inducing senescence (arrested cell division).
